# Supplementary material
Source: Springer Nature journal article supplement (https://www.springermedizin.de/resource/supplementary/12943_2013_1273_MOESM1_ESM.pdf/9553126)
Supplement: MOESM1 [file 9553126]

**Supplementary Table 1** The Correlation between clinicopathologic features and TGF $\beta$ R2 protein expression in NPC

| Characteristics                        | n   | TGF $\beta$ R2 (%) |                | P      |
|----------------------------------------|-----|--------------------|----------------|--------|
|                                        |     | High expression    | Low expression |        |
| <b>Gender</b>                          |     |                    |                |        |
| Male                                   | 103 | 50(48.5)           | 53 (51.5)      | 0.735  |
| Female                                 | 53  | 28(52.8)           | 25 (47.2)      |        |
| <b>Age(y)</b>                          |     |                    |                |        |
| ≥50                                    | 71  | 31 (43.7)          | 40 (56.3)      | 0.198  |
| <50                                    | 85  | 47 (55.3)          | 38(44.7)       |        |
| <b>Smoking</b>                         |     |                    |                |        |
| Yes                                    | 31  | 18 (58.1)          | 13 (41.9)      | 0.423  |
| No                                     | 125 | 60 (48.0)          | 65 (52.0)      |        |
| <b>Family tumor history</b>            |     |                    |                |        |
| Yes                                    | 5   | 4(80.0)            | 1(20.0)        | 0.367  |
| No                                     | 151 | 74(49.0)           | 77(51.0)       |        |
| <b>Recurrence</b>                      |     |                    |                |        |
| Yes                                    | 39  | 17(43.6)           | 22(56.4)       | 0.460  |
| No                                     | 117 | 61(52.1)           | 56(47.9)       |        |
| <b>T classification</b>                |     |                    |                |        |
| T <sub>1</sub> -T <sub>2</sub>         | 109 | 62(56.9)           | 40 (43.1)      | <0.001 |
| T <sub>3</sub> -T <sub>4</sub>         | 47  | 16 (51.7)          | 38(48.3)       |        |
| <b>N classification</b>                |     |                    |                |        |
| N <sub>0</sub> -N <sub>1</sub>         | 87  | 45 (51.7)          | 28(48.3)       | 0.010  |
| N <sub>2</sub> -N <sub>3</sub>         | 69  | 33(47.8)           | 50 (52.2)      |        |
| <b>Distant metastasis <sup>#</sup></b> |     |                    |                |        |
| Yes                                    | 9   | 3 (33.3)           | 6 (66.7)       | 0.495  |
| No                                     | 147 | 75 (51.0)          | 72 (49.0)      |        |
| <b>TNM Clinical stage</b>              |     |                    |                |        |
| I-II                                   | 47  | 31 (66.0)          | 16 (34.0)      | 0.014  |
| III-IV                                 | 109 | 47(43.1)           | 62(56.9)       |        |

<sup>#</sup>The difference that was not statistically significant, possibly due to few patients with distant metastasis

**Supplementary Table 2** Summary of univariate and multivariate Cox regression analysis of overall survival duration

| Parameter                                                         | Univariate analysis |       |              | Multivariate analysis |       |              |
|-------------------------------------------------------------------|---------------------|-------|--------------|-----------------------|-------|--------------|
|                                                                   | <i>P</i>            | HR    | 95%CI        | <i>P</i>              | HR    | 95%CI        |
| Gender                                                            |                     |       |              |                       |       |              |
| Male vs. female                                                   | 0.880               | 1.041 | 0.617-1.755  |                       |       |              |
| Age                                                               |                     |       |              |                       |       |              |
| ≥50 vs. <50 years                                                 | 0.073               | 1.576 | 0.959-2.592  |                       |       |              |
| Family tumor history                                              |                     |       |              |                       |       |              |
| Yes vs. No                                                        | 0.369               | 0.404 | 0.056-2.917  |                       |       |              |
| Smoking                                                           |                     |       |              |                       |       |              |
| Yes vs. No                                                        | 0.536               | 0.814 | 0.425-1.560  |                       |       |              |
| Biotherapy                                                        |                     |       |              |                       |       |              |
| Yes vs. No                                                        | 0.554               | 0.653 | 0.159-2.677  |                       |       |              |
| T classification                                                  |                     |       |              |                       |       |              |
| T <sub>1</sub> -T <sub>2</sub> vs. T <sub>3</sub> -T <sub>4</sub> | <0.001              | 2.574 | 1.573-4.215  | 0.040                 | 1.867 | 1.030-3.383  |
| N classification                                                  |                     |       |              |                       |       |              |
| N <sub>0</sub> -N <sub>1</sub> vs. N <sub>2</sub> -N <sub>3</sub> | <0.001              | 3.553 | 2.011-6.277  | 0.002                 | 3.562 | 1.583-8.014  |
| M classification                                                  |                     |       |              |                       |       |              |
| M <sub>0</sub> vs. M <sub>1</sub>                                 | <0.001              | 6.367 | 3.002-13.507 | 0.000                 | 7.689 | 3.388-17.448 |
| Clinical stage                                                    |                     |       |              |                       |       |              |
| I-II vs. III-IV                                                   | <0.001              | 3.563 | 1.755-7.234  | 0.628                 | 0.759 | 0.249-2.314  |
| TGFBR2 expression                                                 |                     |       |              |                       |       |              |
| High vs. low                                                      | <0.001              | 0.181 | 0.098-0.333  | 0.000                 | 0.239 | 0.125-0.458  |

**Supplementary Table 3.** Differentially expressed miRNAs in three subgroups of tissue samples

| Description | Parametric<br>p-value | FDR       | Permutation<br>p-value | Geom mean of ratios |           |           | Unique id |
|-------------|-----------------------|-----------|------------------------|---------------------|-----------|-----------|-----------|
|             |                       |           |                        | group 1             | group 2   | Group 2   |           |
| hsa-miR-20a | 0.00339               | 0.1932708 | 0.0012                 | 0.489626            | 0.4907058 | 0.9801892 | 6519885   |
| hsa-miR-93  | 0.00621               | 0.1932708 | 0.0025                 | 0.5247165           | 0.5789282 | 1.0329631 | 6520210   |
| hsa-miR-20b | 0.00793               | 0.1932708 | 0.0095                 | 0.5672913           | 0.4738735 | 1.3353771 | 6520264   |
| hsa-miR-18a | 0.04642               | 0.3629741 | 0.0727                 | 0.2738743           | 0.3217721 | 0.6608565 | 6520174   |

**Supplementary Table 4** The information of TGFBR2 interference fragments

| The interference fragment | Base sequence                                                                  |
|---------------------------|--------------------------------------------------------------------------------|
| SiRNA-TGFBR2-homo-462     | Sense ; 5'-GUUCAGAAGUCGGUAAUATT-3'<br>Antisense ; 5'-UAUUAACCGACUUCUGAACTT-3'  |
| SiRNA-TGFBR2-homo-663     | Sense ; 5'-GUGGCUGUAUGGAGAAAGATT-3'<br>Antisense ; 5'-UCUUUCUCCAUACAGCCACTT-3' |
| SiRNA-TGFBR2-homo-796     | Sense ; 5'-GCUCUGAUGAGUGCAAUGATT-3'<br>Antisense ; 5'-UCAUUGCACUCAUCAGAGCTT-3' |
| SiRNA-TGFBR2-homo-1141    | Sense ; 5'-GCUUUGCUGAGGUCUAUAATT-3'<br>Antisense ; 5'-UUAUAGACCUCAGCAAAGCTT-3' |
| SiRNA-TGFBR2-homo-1515    | Sense ; 5'-GACCUCAAGAGCUCCAAUATT-3'<br>Antisense ; 5'-UAUUGGAGCUCUUGAGGUCTT-3' |
| SiRNA-negative control    | Sense ; 5'-UUCUCCGAACGUGUCACGUTT-3'<br>Antisense ; 5'-ACGUGACACGUUCGGAGAATT-3' |
